# Supplementary material for: Perfluorosulfonic Acid Membranes Modified with Polyaniline and Hydrothermally Treated for Potentiometric Sensor Arrays for the Analysis of Combination Drugs
Source: MDPI journal article supplement (doi:10.3390/membranes13030311), 2023-03-08
Supplement: s1 [file s1]

Supplementary Materials

# Perfluorosulfonic Acid Membranes Modified with Polyaniline and Hydrothermally Treated for Potentiometric Sensor Arrays for the Analysis of Combination Drugs

Anna Parshina <sup>1,\*</sup>, Anastasia Yelnikova <sup>1</sup>, Tatyana Kolganova <sup>1</sup>, Tatyana Titova <sup>2</sup>, Polina Yurova <sup>2</sup>, Irina Stenina <sup>2</sup>, Olga Bobreshova <sup>1</sup> and Andrey Yaroslavtsev <sup>2</sup>

<sup>1</sup> Department of Analytical Chemistry, Voronezh State University, Voronezh 394018, Russia

<sup>2</sup> Kurnakov Institute of General and Inorganic Chemistry RAS, Moscow 119991, Russia

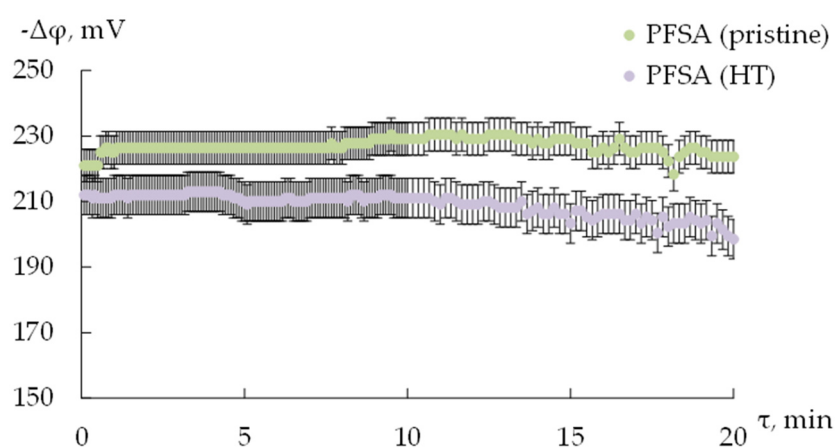

(a)

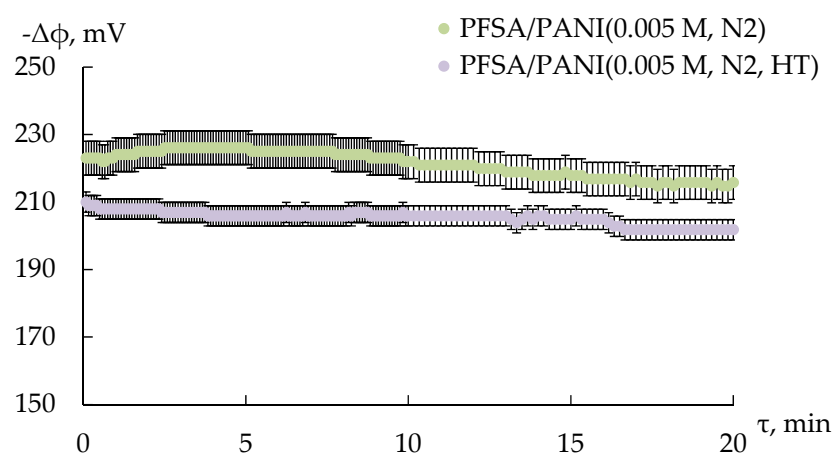

(b)

**Figure S1.** Chronopotentiometric curves of the responses of DP-sensors based on PFSA membranes without PANI (a) and with PANI (b).
